# Supplementary material for: EchidnaCSI: Engaging the public in research and conservation of the short-beaked echidna
Source: PubMed Central journal article supplement — Proc Natl Acad Sci U S A. 2022 Jan 24;119(5):e2108826119. doi: 10.1073/pnas.2108826119 (PMC8812570; doi:10.1073/pnas.2108826119), 2022-01-24
Supplement: pnas.2108826119.sapp.pdf [file pnas.2108826119.sapp.pdf]

## Supplementary Tables

**Table S1:** Events that led to a large increase of EchidnaCSI app downloads. Media = the media company that shared or wrote about EchidnaCSI. App downloads = sum of downloads for the 7 days after the event occurred. N/A = not applicable.

| Date           | Event                 | Media                                     | Media Type           | App downloads |
|----------------|-----------------------|-------------------------------------------|----------------------|---------------|
| 4th Sep 2017   | EchidnaCSI Launch     | Channel 10 News, Channel 7 News, ABC News | TV and news articles | 608           |
| 16th Jan 2018  | CSIRO blog            | CSIRO and Atlas of Living Australia       | Blog article         | 487           |
| 21st Feb 2018  | Guardian article      | The Guardian                              | News article         | 836           |
| 9th Aug 2018   | National Science Week | N/A                                       | In person events     | 222           |
| 9th Jan 2020   | Bushfire awareness    | Facebook, Twitter, Instagram              | Social media posts   | 206           |
| 24th July 2020 | ABC article           | ABC News                                  | News article         | 125           |

**Table S2:** Demographic information from the 2016 Australian Census and the EchidnaCSI Survey. The census and survey data were statistically evaluated to determine any differences in distribution for demographic groups including gender, age, highest level of education and current employment status.

|                   |                                                   | Census counts | Census % | Survey counts | Survey % | Chi-square p-value     |
|-------------------|---------------------------------------------------|---------------|----------|---------------|----------|------------------------|
| <b>Gender</b>     | <b>Female</b>                                     | 11,855,248    | 50.7     | 590           | 62.5     | 3.54x10 <sup>-14</sup> |
|                   | <b>Male</b>                                       | 11,546,638    | 49.3     | 345           | 36.5     |                        |
| <b>Age</b>        | <b>25-34</b>                                      | 3368449       | 21.0     | 71            | 7.7      | <0.000001              |
|                   | <b>35-44</b>                                      | 3144936       | 19.6     | 139           | 15.1     | 0.00805                |
|                   | <b>45-54</b>                                      | 3105006       | 19.3     | 222           | 24.1     | 0.00361                |
|                   | <b>55-64</b>                                      | 2753729       | 17.2     | 260           | 28.2     | <0.000001              |
|                   | <b>65-74</b>                                      | 2076715       | 12.9     | 203           | 22.0     | <0.000001              |
|                   | <b>75-84</b>                                      | 1113206       | 6.9      | 25            | 2.7      | 0.000006               |
|                   | <b>85+</b>                                        | 486,842       | 3.0      | 1             | 0.1      | 0.000003               |
| <b>Education</b>  | <b>Bachelor's degree level and above</b>          | 4,181,406     | 25.5     | 428           | 46.3     | <0.000001              |
|                   | <b>Advanced Diploma and Diploma level</b>         | 1,687,893     | 10.3     | 238           | 25.7     | <0.000001              |
|                   | <b>Vocational qualification/ Certificate I-IV</b> | 3,009,600     | 18.4     | 129           | 13.9     | 0.00536                |
|                   | <b>Year 12 or equivalent</b>                      | 2,994,097     | 18.3     | 72            | 7.8      | <0.000001              |
|                   | <b>Less than year 12 or equivalent</b>            | 4,525,759     | 27.6     | 58            | 6.3      | <0.000001              |
| <b>Employment</b> | <b>Worked full-time</b>                           | 6,623,065     | 46.0     | 280           | 42.0     | 0.303                  |

|                                                                        |                                                                    |           |      |     |      |           |
|------------------------------------------------------------------------|--------------------------------------------------------------------|-----------|------|-----|------|-----------|
|                                                                        | <b>Worked part-time</b>                                            | 3,491,503 | 24.2 | 125 | 18.7 | 0.00731   |
|                                                                        | <b>Unemployed</b>                                                  | 787,452   | 5.5  | 26  | 3.9  | 0.597     |
|                                                                        | <b>Retired</b>                                                     | 3,500,000 | 24.3 | 236 | 35.4 | <0.000001 |
| <b>Ethnicity</b>                                                       | <b>Australian</b>                                                  | -         | -    | 778 | 82.4 | -         |
|                                                                        | <b>Australian, Other</b>                                           | -         | -    | 39  | 4.1  | -         |
|                                                                        | <b>Australian, European</b>                                        | -         | -    | 34  | 3.6  | -         |
|                                                                        | <b>European</b>                                                    | -         | -    | 34  | 3.6  | -         |
|                                                                        | <b>Australian, New Zealander</b>                                   | -         | -    | 10  | 1.1  | -         |
|                                                                        | <b>Prefer not to answer</b>                                        | -         | -    | 8   | 0.8  | -         |
|                                                                        | <b>North American</b>                                              | -         | -    | 6   | 0.6  | -         |
|                                                                        | <b>Australian, European, Other</b>                                 | -         | -    | 4   | 0.4  | -         |
|                                                                        | <b>Australian, North American</b>                                  | -         | -    | 4   | 0.4  | -         |
|                                                                        | <b>Other</b>                                                       | -         | -    | 4   | 0.4  | -         |
|                                                                        | <b>Asian</b>                                                       | -         | -    | 3   | 0.3  | -         |
|                                                                        | <b>Indigenous Australian or Torres Strait Islander</b>             | -         | -    | 2   | 0.2  | -         |
|                                                                        | <b>New Zealander</b>                                               | -         | -    | 3   | 0.3  | -         |
|                                                                        | <b>South American</b>                                              | -         | -    | 3   | 0.3  | -         |
|                                                                        | <b>Australian, Indigenous Australian or Torres Strait Islander</b> | -         | -    | 3   | 0.3  | -         |
|                                                                        | <b>Australian, Asian</b>                                           | -         | -    | 1   | 0.1  | -         |
|                                                                        | <b>Australian, Indian</b>                                          | -         | -    | 1   | 0.1  | -         |
|                                                                        | <b>Indigenous Australian or Torres Strait Islander, European</b>   | -         | -    | 1   | 0.1  | -         |
|                                                                        | <b>Australian, Middle Eastern, European</b>                        | -         | -    | 1   | 0.1  | -         |
|                                                                        | <b>Australian, New Zealander, European</b>                         | -         | -    | 1   | 0.1  | -         |
|                                                                        | <b>Australian, Prefer not to answer</b>                            | -         | -    | 1   | 0.1  | -         |
|                                                                        | <b>Indian</b>                                                      | -         | -    | 1   | 0.1  | -         |
| <b>Indigenous Australian or Torres Strait Islander, North American</b> | -                                                                  | -         | 1    | 0.1 | -    |           |
| <b>Indigenous Australian or Torres Strait Islander, Other</b>          | -                                                                  | -         | 1    | 0.1 | -    |           |

**Table S3:** Survey answers depicting participants' current attitudes or behaviours towards a range of statements. Counts and percentages of how participants ranked each question is below and separated between those that submitted data ('submitters' = S), to those that did not submit data but engaged in the project ('non-submitters' = NS). Percentages that are of particular interest and discussed in the text are underlined. The distribution of answers between submitters and non-submitters was statistically evaluated.

| What are your current views on the following statements?       |          |         |       |         |                            |         |       |         |       |            |       |             |            |         |
|----------------------------------------------------------------|----------|---------|-------|---------|----------------------------|---------|-------|---------|-------|------------|-------|-------------|------------|---------|
| Question                                                       | Disagree |         |       |         | Neither agree nor disagree |         |       |         | Agree |            |       |             | Chi-square |         |
|                                                                | S        |         | NS    |         | S                          |         | NS    |         | S     |            | NS    |             |            | p-value |
|                                                                | Count    | Percent | Count | Percent | Count                      | Percent | Count | Percent | Count | Percent    | Count | Percent     |            |         |
| Echidna conservation is important to me                        | 0        | 0%      | 2     | 1%      | 8                          | 1%      | 4     | 1%      | 559   | <u>99%</u> | 302   | <u>98%</u>  | 0.157      |         |
| The health of the environment is important to me               | 0        | 0%      | 0     | 0%      | 3                          | 1%      | 1     | 0%      | 564   | <u>99%</u> | 307   | <u>100%</u> | 0.829      |         |
| I take actions to protect or preserve the environment          | 0        | 0%      | 2     | 1%      | 16                         | 3%      | 11    | 4%      | 551   | <u>97%</u> | 295   | <u>96%</u>  | 0.130      |         |
| Participating in citizen science is worth my time              | 0        | 0%      | 0     | 0%      | 45                         | 8%      | 28    | 9%      | 522   | <u>92%</u> | 280   | <u>91%</u>  | 0.764      |         |
| I do what I can, but the environment is not my biggest concern | 366      | 65%     | 203   | 66%     | 147                        | 26%     | 83    | 27%     | 54    | 10%        | 22    | 7%          | 0.487      |         |

**Table S4:** Survey answers depicting participants' changes in attitudes or behaviours to a range of statements due to their involvement in EchidnaCSI. Counts and percentages of how participants ranked each question is below and separated between those that submitted data ('submitters' = S), to those that did not submit data but engaged in the project ('non-submitters' = NS). The distribution of answers between submitters and non-submitters was statistically evaluated, significant differences ( $p < 0.05$ ) are bolded.

| How do you think your views to these statements have changed since following EchidnaCSI? |           |         |       |         |                   |         |       |         |            |            |            |            |                              |         |
|------------------------------------------------------------------------------------------|-----------|---------|-------|---------|-------------------|---------|-------|---------|------------|------------|------------|------------|------------------------------|---------|
| Question                                                                                 | Decreased |         |       |         | Remained the same |         |       |         | Increased  |            |            |            | Chi-square                   |         |
|                                                                                          | S         |         | NS    |         | S                 |         | NS    |         | S          |            | NS         |            |                              | p-value |
|                                                                                          | Count     | Percent | Count | Percent | Count             | Percent | Count | Percent | Count      | Percent    | Count      | Percent    |                              |         |
| Echidna conservation is important to me                                                  | 2         | 0%      | 0     | 0%      | 328               | 58%     | 198   | 64%     | 237        | 42%        | 110        | 36%        | 0.115                        |         |
| The health of the environment is important to me                                         | 1         | 0%      | 0     | 0%      | 433               | 76%     | 240   | 78%     | 133        | 23%        | 68         | 22%        | 0.680                        |         |
| I take actions to protect or preserve the environment                                    | 1         | 0%      | 1     | 0%      | 416               | 73%     | 234   | 76%     | 150        | 26%        | 73         | 24%        | 0.616                        |         |
| Participating in citizen science is worth my time                                        | 6         | 1%      | 3     | 1%      | 280               | 49%     | 205   | 67%     | <b>281</b> | <b>50%</b> | <b>100</b> | <b>32%</b> | <b>6.07x10<sup>-06</sup></b> |         |
| I do what I can, but the environment is not my biggest concern                           | 86        | 15%     | 37    | 12%     | 436               | 77%     | 252   | 82%     | 45         | 8%         | 19         | 6%         | 0.237                        |         |

**Table S5:** Survey answers depicting participants' motivations for their involvement in EchidnaCSI, from those who had submitted data to EchidnaCSI ('submitters'). The questions are ranked from 'most important' to 'least important' based on the responses.

| Question                                                                               | Very Unimportant |         | Somewhat Unimportant |         | Neutral |         | Somewhat Important |         | Very Important |         |
|----------------------------------------------------------------------------------------|------------------|---------|----------------------|---------|---------|---------|--------------------|---------|----------------|---------|
|                                                                                        | Count            | Percent | Count                | Percent | Count   | Percent | Count              | Percent | Count          | Percent |
| I want to contribute to wildlife conservation                                          | 25               | 4%      | 5                    | 1%      | 14      | 2%      | 92                 | 16%     | 431            | 76%     |
| I like echidnas                                                                        | 30               | 5%      | 10                   | 2%      | 33      | 6%      | 145                | 26%     | 349            | 62%     |
| I enjoy contributing to original scientific research                                   | 21               | 4%      | 15                   | 3%      | 42      | 7%      | 193                | 34%     | 296            | 52%     |
| I want to learn more about echidnas                                                    | 28               | 5%      | 13                   | 2%      | 60      | 11%     | 205                | 36%     | 261            | 46%     |
| The project is easy to participate in                                                  | 17               | 3%      | 17                   | 3%      | 91      | 16%     | 198                | 35%     | 244            | 43%     |
| I like hearing news about the project's progress and outcomes                          | 17               | 3%      | 20                   | 4%      | 59      | 10%     | 240                | 42%     | 231            | 41%     |
| It is easy to submit data                                                              | 32               | 6%      | 9                    | 2%      | 117     | 21%     | 175                | 31%     | 234            | 41%     |
| I enjoy being a part of a community of like-minded people                              | 29               | 5%      | 43                   | 8%      | 133     | 23%     | 196                | 35%     | 166            | 29%     |
| I find EchidnaCSI a valuable resource for teaching others                              | 50               | 9%      | 66                   | 12%     | 178     | 31%     | 141                | 25%     | 132            | 23%     |
| I enjoy the time I spend with my family and/or friends when contributing to EchidnaCSI | 69               | 12%     | 61                   | 11%     | 203     | 36%     | 120                | 21%     | 114            | 20%     |
| I like seeing recognition of my or other participants' contributions to the project    | 52               | 9%      | 74                   | 13%     | 193     | 34%     | 148                | 26%     | 100            | 18%     |
| I am interested in molecular biology                                                   | 134              | 24%     | 106                  | 19%     | 207     | 37%     | 87                 | 15%     | 33             | 6%      |

**Table S6:** Survey answers depicting participants' motivations for their involvement in EchidnaCSI, from those who had not submitted data, but still engaged with EchidnaCSI ('non-submitters'). The questions are ranked from 'most important' to 'least important' based on the responses.

| Question                                                                               | Very Unimportant |         | Somewhat Unimportant |         | Neutral |         | Somewhat Important |         | Very Important |         |
|----------------------------------------------------------------------------------------|------------------|---------|----------------------|---------|---------|---------|--------------------|---------|----------------|---------|
|                                                                                        | Count            | Percent | Count                | Percent | Count   | Percent | Count              | Percent | Count          | Percent |
| I like echidnas                                                                        | 13               | 4%      | 3                    | 1%      | 11      | 4%      | 69                 | 22%     | 212            | 69%     |
| I want to contribute to wildlife conservation                                          | 7                | 2%      | 2                    | 1%      | 12      | 4%      | 74                 | 24%     | 213            | 69%     |
| I want to learn more about echidnas                                                    | 8                | 3%      | 8                    | 3%      | 19      | 6%      | 103                | 33%     | 170            | 55%     |
| I intend to submit data in the future                                                  | 8                | 3%      | 7                    | 2%      | 37      | 12%     | 117                | 38%     | 139            | 45%     |
| I am excited to contribute to original scientific research                             | 8                | 3%      | 10                   | 3%      | 43      | 14%     | 114                | 37%     | 133            | 43%     |
| I like hearing news about the project's progress and outcomes                          | 6                | 2%      | 6                    | 2%      | 31      | 10%     | 136                | 44%     | 129            | 42%     |
| It is easy to submit data                                                              | 8                | 3%      | 9                    | 3%      | 85      | 28%     | 92                 | 30%     | 114            | 37%     |
| I enjoy being a part of a community of like-minded people                              | 11               | 4%      | 20                   | 6%      | 66      | 21%     | 134                | 44%     | 77             | 25%     |
| I find EchidnaCSI a valuable resource for teaching others                              | 20               | 6%      | 36                   | 12%     | 104     | 34%     | 88                 | 29%     | 60             | 19%     |
| I like seeing recognition of my or other participants' contributions to the project    | 28               | 9%      | 39                   | 13%     | 106     | 34%     | 89                 | 29%     | 46             | 15%     |
| I enjoy the time I spend with my family and/or friends when contributing to EchidnaCSI | 40               | 13%     | 30                   | 10%     | 145     | 47%     | 50                 | 16%     | 43             | 14%     |
| I am interested in molecular biology                                                   | 49               | 16%     | 59                   | 19%     | 115     | 37%     | 60                 | 19%     | 25             | 8%      |

## Supplementary Figure

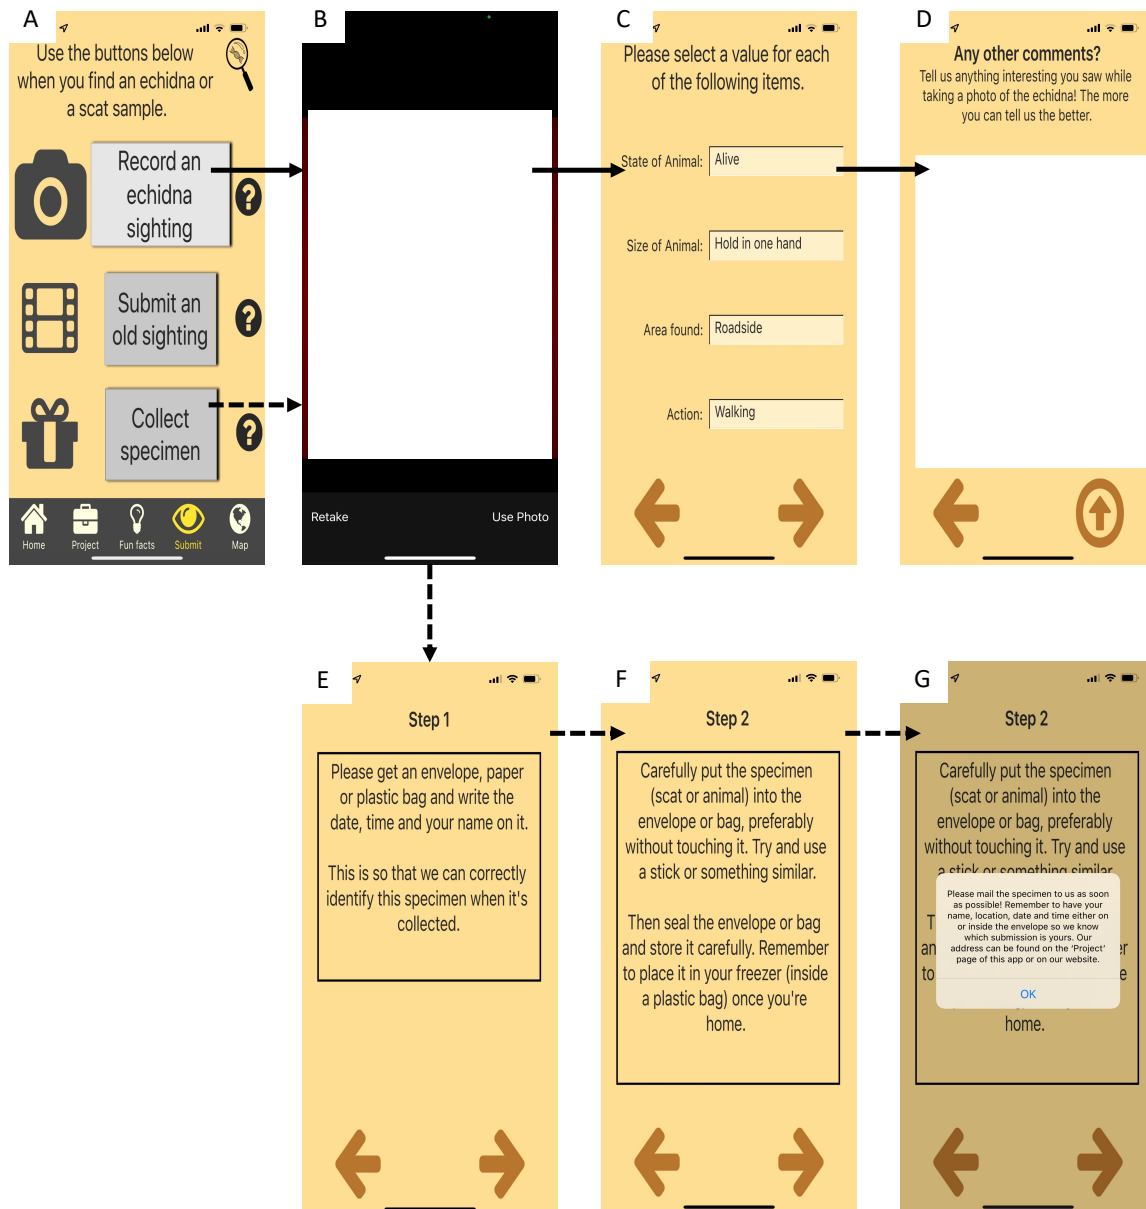

**Figure S1: EchidnaCSI app submission workflow.** Screenshots of the EchidnaCSI app data and material submission pages, where bold arrows depict the workflow for submitting an echidna sighting and the dotted arrows show the workflow for submitting an echidna scat or any material collection. A) Users are directed to the 'Submit' page where they can either 'Record an echidna sightings' directly through the app, 'Submit an old sighting' if they have photos saved on their smartphone, or 'Collect specimen' if they found an echidna scat to collect. B) If recording a new echidna sighting or collecting a scat, users are taken to their phone camera to take a photo of either the echidna or scat. C) If submitting a sighting of an echidna, four questions are asked about the echidna with pre-designed answer options to choose from (see methods for more information). D) Users are lastly able to add any additional comments they would like about their submission. E) If users selected the 'Collect specimen' option they are directed to this instruction page following taking a photo, where the app guides them to prepare a plastic bag or envelope to add details about the collection to. F) Users are then directed how to collect the scat (or animal in case of roadkill situations). G) Users are then guided to send us the specimen and where they can find our mailing address.

## Supplementary File 1

### Survey questions

Full Name:

---

---

Email address (if registered through the EchidnaCSI app please enter the same email)

---

---

What is your age?

18 - 24 years (1)

25 - 34 years (2)

35 - 44 years (3)

45 - 54 years (4)

55 - 64 years (5)

65 - 74 years (6)

75 - 84 years (7)

85+ years (8)

---

What is your gender?

Male (1)

Female (2)

Prefer not to say (3)

Other (4) \_\_\_\_\_

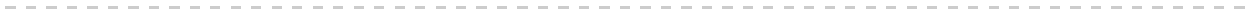



Which ethnic group do you identify with? (Select all that apply.)

- Australian (1)
- Indigenous Australian or Torres Strait Islander (2)
- New Zealander (3)
- Asian (4)
- Indian (5)
- Middle Eastern (6)
- European (7)
- North American (10)
- South American (11)
- African (12)
- Prefer not to answer (8)
- Other: (9) \_\_\_\_\_

-----

What is your postcode?

\_\_\_\_\_

-----

What is the highest level of education that you have completed?

- Less than year 12 or equivalent (1)
- Year 12 or equivalent (2)
- Vocational qualification/Certificate I-IV (3)
- Diploma (4)
- Advanced Diploma/Associate Degree (5)
- Bachelor Degree (6)
- Honours Degree (7)
- Graduate Diploma (8)
- Masters Degree (9)
- Doctoral Degree (10)
- Other (11) \_\_\_\_\_

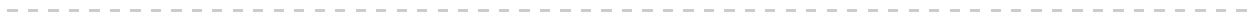

What is your highest level of science education?

- Year 10 or below (1)
  - Year 11 or 12 (2)
  - Bachelor Degree (3)
  - Honours Degree (4)
  - Master's Degree (5)
  - Doctorate (6)
  - Self directed learning (7)
  - Other (8) \_\_\_\_\_
- 

What is your current employment status? (Select all that apply.)

- Employed full time (1)
- Employed part time (2)
- Employed casually (3)
- Self-employed (9)
- Retired (4)
- Student (5)
- Unemployed (6)
- Other (7) \_\_\_\_\_

---

If employed, what is your job title/description?

---

---

Are you involved in any other volunteering?

No (1)

Yes (please specify) (2) \_\_\_\_\_

**End of Block: Demographics**

---

**Start of Block: Level of activity/involvement with the project**

How did you first hear about EchidnaCSI? (Select all that apply.)

- Word of mouth (1)
  - Radio (2)
  - TV (3)
  - Facebook (4)
  - Twitter (5)
  - Instagram (14)
  - Newspaper (6)
  - Presentation (7)
  - Conference (8)
  - University of Adelaide (9)
  - Other university (10)
  - Internet search (11)
  - Unsure (13)
  - Other: (12) \_\_\_\_\_
-

Have you promoted EchidnaCSI to anyone? (Select all that apply.)

No (1)

Yes, to family (2)

Yes, to friends (3)

Yes, to colleagues (4)

Yes, online (e.g. through social media) (5)

Yes, other (6) \_\_\_\_\_

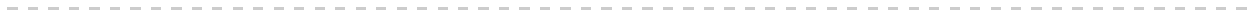

How do you currently keep up with EchidnaCSI? (Select all that apply.)

- Email newsletter (1)
  - Facebook (2)
  - Twitter (3)
  - Instagram (4)
  - Email communication (5)
  - EchidnaCSI webpage (6)
  - Attending event/s (7)
  - Atlas of Living Australia/BioCollect (9)
  - Other (8) \_\_\_\_\_
- 

Have you submitted any data to EchidnaCSI?

- Yes (1)
- No (2)

**End of Block: Level of activity/involvement with the project**

---

**Start of Block: If not submitted: app feedback**

What is the reason you have not submitted data yet? (Select all that apply.)

- Haven't seen an echidna or echidna scat (1)
  - Have seen an echidna, but couldn't capture a photo (2)
  - No longer interested in the project (3)
  - Could not complete the submission process (4)
  - Other (5) \_\_\_\_\_
- 

For the following questions, we understand that even though you have not submitted data you may have downloaded the app and attempted to use it. If this is not the case please select 'Have not used the app'.

---

How easy do you find the EchidnaCSI app to use?

- Easy (1)
  - Neither easy nor difficult (2)
  - Difficult (3)
  - Have not used the app (6)
-



Did you find entering your registration information into the app a barrier to participating?

- No (4)
- Yes, because of privacy reasons (1)
- Yes, because it was tedious (2)
- Yes, because of another reason: (3)

---

Have not used the app (5)

-----

On a scale of 1-5 (1 being least and 5 being most), how important would you rate these potential new features for the EchidnaCSI app?

|                                                                                               | 1 (1)                 | 2 (2)                 | 3 (3)                 | 4 (4)                 | 5 (5)                 |
|-----------------------------------------------------------------------------------------------|-----------------------|-----------------------|-----------------------|-----------------------|-----------------------|
| Automatic registration on the Atlas of Living Australia so you can track your submissions (1) | <input type="radio"/> |
| App displays a list of your submissions (2)                                                   | <input type="radio"/> |
| Ability to edit/update your submissions inside the app (3)                                    | <input type="radio"/> |
| App displays your user information (4)                                                        | <input type="radio"/> |
| Ability to edit user information inside the app (5)                                           | <input type="radio"/> |
| Submissions from other users appear on the map (6)                                            | <input type="radio"/> |
| Ability to submit videos (7)                                                                  | <input type="radio"/> |

---

Do you have any other comments about the app?

---

---

---

---

---

End of Block: If not submitted: app feedback

---

Start of Block: If not submitted: motivations

How important are these factors in your interest in EchidnaCSI?

|                                                                | Very Unimportant (1)  | Somewhat Unimportant (6) | Neutral (2)           | Somewhat Important (3) | Very Important (4)    |
|----------------------------------------------------------------|-----------------------|--------------------------|-----------------------|------------------------|-----------------------|
| I like echidnas (1)                                            | <input type="radio"/> | <input type="radio"/>    | <input type="radio"/> | <input type="radio"/>  | <input type="radio"/> |
| I want to learn more about echidnas (2)                        | <input type="radio"/> | <input type="radio"/>    | <input type="radio"/> | <input type="radio"/>  | <input type="radio"/> |
| It is easy to submit data (3)                                  | <input type="radio"/> | <input type="radio"/>    | <input type="radio"/> | <input type="radio"/>  | <input type="radio"/> |
| I intend to submit data in the future (4)                      | <input type="radio"/> | <input type="radio"/>    | <input type="radio"/> | <input type="radio"/>  | <input type="radio"/> |
| I am interested in molecular biology (5)                       | <input type="radio"/> | <input type="radio"/>    | <input type="radio"/> | <input type="radio"/>  | <input type="radio"/> |
| I am excited to contribute to original scientific research (6) | <input type="radio"/> | <input type="radio"/>    | <input type="radio"/> | <input type="radio"/>  | <input type="radio"/> |
| I find EchidnaCSI a valuable resource for teaching others (7)  | <input type="radio"/> | <input type="radio"/>    | <input type="radio"/> | <input type="radio"/>  | <input type="radio"/> |
| I want to contribute to wildlife conservation (8)              | <input type="radio"/> | <input type="radio"/>    | <input type="radio"/> | <input type="radio"/>  | <input type="radio"/> |

I enjoy the time I spend with my family and/or friends when contributing to EchidnaCSI (9)

I enjoy being a part of a community of like-minded people (10)

I like seeing recognition of my or other participants' contributions to the project (12)

I like hearing news about the project's progress and outcomes (13)

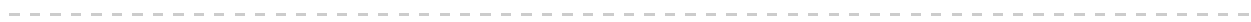

What are your current views on the following statements?

|                                                                    | Disagree (1)          | Neither agree nor disagree (2) | Agree (3)             |
|--------------------------------------------------------------------|-----------------------|--------------------------------|-----------------------|
| Echidna conservation is important to me (1)                        | <input type="radio"/> | <input type="radio"/>          | <input type="radio"/> |
| The health of the environment is important to me (2)               | <input type="radio"/> | <input type="radio"/>          | <input type="radio"/> |
| I take actions to protect or preserve the environment (3)          | <input type="radio"/> | <input type="radio"/>          | <input type="radio"/> |
| Participating in citizen science is worth my time (4)              | <input type="radio"/> | <input type="radio"/>          | <input type="radio"/> |
| I do what I can, but the environment is not my biggest concern (5) | <input type="radio"/> | <input type="radio"/>          | <input type="radio"/> |

How have the strength of your views changed due to following EchidnaCSI?

|                                                                    | Decreased (1)         | Remained the same (2) | Increased (3)         |
|--------------------------------------------------------------------|-----------------------|-----------------------|-----------------------|
| Echidna conservation is important to me (1)                        | <input type="radio"/> | <input type="radio"/> | <input type="radio"/> |
| The health of the environment is important to me (2)               | <input type="radio"/> | <input type="radio"/> | <input type="radio"/> |
| I take actions to protect or preserve the environment (3)          | <input type="radio"/> | <input type="radio"/> | <input type="radio"/> |
| Participating in citizen science is worth my time (4)              | <input type="radio"/> | <input type="radio"/> | <input type="radio"/> |
| I do what I can, but the environment is not my biggest concern (5) | <input type="radio"/> | <input type="radio"/> | <input type="radio"/> |

End of Block: If not submitted: motivations

---

Start of Block: Attitudes for citizen science - for non-submitters

Had you heard of 'citizen science' before following EchidnaCSI?

Yes (1)

No (2)

---

Are you participating in any other citizen science projects?

No (1)

Yes (please specify) (2) \_\_\_\_\_

---

If yes, did you join the project/s before or after being involved in EchidnaCSI?

Before (1)

After (2)

Unsure (3)

Not applicable (4)

---

Are you more likely to be involved in other citizen science projects since following EchidnaCSI?

Yes (1)

No (2)

Unsure (3)

End of Block: Attitudes for citizen science - for non-submitters



---

Start of Block: If not submitted: future participation

How could the experience of participating in EchidnaCSI be improved to maintain your interest?  
(Select all that apply)

- Feedback about how your data is being used by scientists (1)
  - More information on the process of the molecular analysis of echidna scats (2)
  - Feedback about the results of molecular analysis of the echidna scats (3)
  - More educational material available about echidnas and their conservation (4)
  - More information about the team behind EchidnaCSI (5)
  - Regular updates about the project (6)
  - Regular updates about the data being submitted (7)
  - Regular videos and photos of interesting echidna sightings (8)
  - Regular events and/or educational workshops (9)
  - Improved instructions on how to submit data (10)
  - Other (please specify) (11)
- 

-----

How would you most like to receive information from EchidnaCSI? (Select all that apply)

- Email newsletter (1)
  - BioCollect website (2)
  - EchidnaCSI webpage (3)
  - Facebook (4)
  - Twitter (5)
  - Instagram (6)
  - Attending events (7)
  - In the app (8)
  - Other (please specify): (9)
- 

-----

In 12 months time, do you anticipate:

|                                               | Yes (1)               | No (2)                | Maybe (3)             |
|-----------------------------------------------|-----------------------|-----------------------|-----------------------|
| Actively contributing data to Echidna CSI (1) | <input type="radio"/> | <input type="radio"/> | <input type="radio"/> |
| Staying up to date with the project (2)       | <input type="radio"/> | <input type="radio"/> | <input type="radio"/> |

-----

If you have anything else you would like to share including stories about participating in EchidnaCSI or echidna encounters in general we would love to hear them:

---

---

---

---

---

End of Block: If not submitted: future participation

---

Start of Block: Level of involvement: if submitted data

Have you used the EchidnaCSI app to submit data?

- Yes (1)
  - No (2)
- 

Have you used the BioCollect website to submit data?

- Yes (1)
  - No (2)
- 

Have you tried to use the BioCollect website to view your submissions?

- Yes, and I was successful (1)
  - Yes, and I was unsuccessful (2)
  - No (3)
-

How many sightings of echidnas have you submitted? (Best estimation if unsure.)

0 (1)

1 (2)

2 (3)

3 (4)

4 (5)

5-9 (6)

10-19 (7)

20-49 (8)

50+ (9)

---

How many scats have you submitted? (Best estimation if unsure.)

0 (1)

1 (2)

2 (3)

3-9 (4)

10-19 (5)

20-49 (6)

50+ (7)

---

When do you record echidna sightings/scats? (Select all that apply.)

At home (1)

On holidays (2)

When out driving (3)

Taking walks (4)

While working (5)

When actively searching (6)

Other (7) \_\_\_\_\_



Who are you with when you submit sightings? (Select all that apply.)

By myself (1)

Partner (2)

Children (3)

Grandchildren (4)

Parent (5)

Grandparent (6)

Friend (7)

Colleague (8)

Other (9) \_\_\_\_\_

---

Do you actively look for echidnas because of EchidnaCSI?

Yes (1)

No (4)

Yes, but I also see them by chance (2)

Unsure (5) \_\_\_\_\_

---

Do you actively look for echidna scats because of EchidnaCSI?

- Yes (1)
- No (4)
- Yes, but I also see them by chance (2)
- Unsure (5) \_\_\_\_\_

End of Block: Level of involvement: if submitted data

---

Start of Block: If submitted: app feedback

How easy to use do you find the EchidnaCSI app?

- Easy (1)
  - Neither easy nor difficult (2)
  - Difficult (3)
  - Have not used the app (6)
- 

Did you find entering your registration information a barrier to participating?

- No (4)
  - Yes, because of privacy reasons (1)
  - Yes, because it was tedious (2)
  - Yes, because of another reason: (3)  
\_\_\_\_\_
-

On a scale of 1-5 (1 being least and 5 being most), how important would you rate these potential new features for the EchidnaCSI app?

|                                                                                               | 1 (1)                 | 2 (2)                 | 3 (3)                 | 4 (4)                 | 5 (5)                 |
|-----------------------------------------------------------------------------------------------|-----------------------|-----------------------|-----------------------|-----------------------|-----------------------|
| Automatic registration on the Atlas of Living Australia so you can track your submissions (1) | <input type="radio"/> |
| App displays a list of your submissions (2)                                                   | <input type="radio"/> |
| Ability to edit/update your submissions inside the app (3)                                    | <input type="radio"/> |
| App displays your user information (4)                                                        | <input type="radio"/> |
| Ability to edit user information inside the app (5)                                           | <input type="radio"/> |
| Submissions from other users appear on the map (6)                                            | <input type="radio"/> |
| Ability to submit videos (7)                                                                  | <input type="radio"/> |

---



Do you have any other comments about the app?

---

---

---

---

---

End of Block: If submitted: app feedback

---

Start of Block: Attitudes towards citizen science

Had you heard of 'citizen science' before participating in EchidnaCSI?

Yes (1)

No (2)

---

Are you participating in any other citizen science projects?

No (1)

Yes (please specify) (2) \_\_\_\_\_

---

If yes, did you join the project/s before or after being involved in EchidnaCSI?

Before (1)

After (2)

Unsure (3)

Not Applicable (4)

---

Are you more likely to be involved in other citizen science projects since participating in EchidnaCSI?

Yes (1)

No (2)

Unsure (3)

**End of Block: Attitudes towards citizen science**

---

**Start of Block: Motivations**

How important are these factors to your participation in EchidnaCSI?

|                                                               | Very Unimportant (1)  | Somewhat Unimportant (2) | Neutral (3)           | Somewhat Important (4) | Very Important (5)    |
|---------------------------------------------------------------|-----------------------|--------------------------|-----------------------|------------------------|-----------------------|
| I like echidnas (1)                                           | <input type="radio"/> | <input type="radio"/>    | <input type="radio"/> | <input type="radio"/>  | <input type="radio"/> |
| I want to learn more about echidnas (2)                       | <input type="radio"/> | <input type="radio"/>    | <input type="radio"/> | <input type="radio"/>  | <input type="radio"/> |
| It is easy to submit data (3)                                 | <input type="radio"/> | <input type="radio"/>    | <input type="radio"/> | <input type="radio"/>  | <input type="radio"/> |
| I am interested in molecular biology (4)                      | <input type="radio"/> | <input type="radio"/>    | <input type="radio"/> | <input type="radio"/>  | <input type="radio"/> |
| The project is easy to participate in (5)                     | <input type="radio"/> | <input type="radio"/>    | <input type="radio"/> | <input type="radio"/>  | <input type="radio"/> |
| I enjoy contributing to original scientific research (6)      | <input type="radio"/> | <input type="radio"/>    | <input type="radio"/> | <input type="radio"/>  | <input type="radio"/> |
| I find EchidnaCSI a valuable resource for teaching others (7) | <input type="radio"/> | <input type="radio"/>    | <input type="radio"/> | <input type="radio"/>  | <input type="radio"/> |
| I want to contribute to wildlife conservation (8)             | <input type="radio"/> | <input type="radio"/>    | <input type="radio"/> | <input type="radio"/>  | <input type="radio"/> |

I enjoy the time I spend with my family and/or friends when contributing to EchidnaCSI (9)

I enjoy being a part of a community of like-minded people (10)

I like seeing recognition of my or other participants' contributions to the project (12)

I like hearing news about the project's progress and outcomes (13)



What are your current views on the following statements?

|                                                                    | Disagree (1)          | Neither agree nor disagree (2) | Agree (3)             |
|--------------------------------------------------------------------|-----------------------|--------------------------------|-----------------------|
| Echidna conservation is important to me (1)                        | <input type="radio"/> | <input type="radio"/>          | <input type="radio"/> |
| The health of the environment is important to me (2)               | <input type="radio"/> | <input type="radio"/>          | <input type="radio"/> |
| I take actions to protect or preserve the environment (3)          | <input type="radio"/> | <input type="radio"/>          | <input type="radio"/> |
| Participating in citizen science is worth my time (4)              | <input type="radio"/> | <input type="radio"/>          | <input type="radio"/> |
| I do what I can, but the environment is not my biggest concern (5) | <input type="radio"/> | <input type="radio"/>          | <input type="radio"/> |

How have the strength of your views changed due to following EchidnaCSI?

|                                                                    | Decreased (1)         | Remained the same (2) | Increased (3)         |
|--------------------------------------------------------------------|-----------------------|-----------------------|-----------------------|
| Echidna conservation is important to me (1)                        | <input type="radio"/> | <input type="radio"/> | <input type="radio"/> |
| The health of the environment is important to me (2)               | <input type="radio"/> | <input type="radio"/> | <input type="radio"/> |
| I take actions to protect or preserve the environment (3)          | <input type="radio"/> | <input type="radio"/> | <input type="radio"/> |
| Participating in citizen science is worth my time (4)              | <input type="radio"/> | <input type="radio"/> | <input type="radio"/> |
| I do what I can, but the environment is not my biggest concern (5) | <input type="radio"/> | <input type="radio"/> | <input type="radio"/> |

End of Block: Motivations

---

Start of Block: Future participation/improving future experience

How would you prefer to receive information from EchidnaCSI? (Select all that apply.)

- Email newsletter (1)
  - BioCollect website (2)
  - EchidnaCSI webpage (3)
  - Facebook (4)
  - Twitter (5)
  - Instagram (6)
  - Attending events (7)
  - Other (please specify): (8)
- 

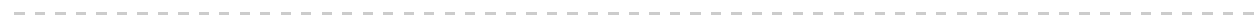

How could the experience of participating in EchidnaCSI be improved to maintain your participation? (Select all that apply.)

- Feedback about how your data is being used by scientists (1)
  - More information on the process of the molecular analysis of echidna scats (2)
  - Feedback on the results of molecular analysis of echidna scats (3)
  - More educational material available about echidnas and their conservation (4)
  - More information about the team behind EchidnaCSI (5)
  - Regular updates about the project (6)
  - Regular updates about the data being submitted (7)
  - Regular videos and photos about interesting echidna sightings (8)
  - Regular events and/or educational workshops (9)
  - Improved instructions on how to submit data (10)
  - Other (please specify) (11)
- 

In 12 months time, do you anticipate:

|                                               | Yes (1)               | No (2)                | Maybe (3)             |
|-----------------------------------------------|-----------------------|-----------------------|-----------------------|
| Actively contributing data to Echidna CSI (1) | <input type="radio"/> | <input type="radio"/> | <input type="radio"/> |
| Staying up to date with the project (2)       | <input type="radio"/> | <input type="radio"/> | <input type="radio"/> |



---

If you have anything else you would like to share, including feedback about the project, stories about participating in EchidnaCSI or echidna encounters in general, we would love to hear them:

---

---

---

---

---

End of Block: Future participation/improving future experience

---
